# Supplementary material
Source: PubMed Central journal article supplement (PMC9210275)
Supplement: jkab429_supplemental_material.pdf [file jkab429_supplemental_material.pdf]

**Supplementary Information**  
**Supplementary File Captions.**

**Supplementary File S1.** Electropharyngeogram recordings of *pezo-1* mutants induced to perform pharyngeal pumping by immersion in a 10mM serotonin bath displayed no pharyngeal pumping deficits in pumping frequency (**A**), pump duration (**B**), and inter-pump intervals (**C**) N>20. Values reported are mean+/- SEMs.

**Supplementary File S2.** Increasing food density caused the brightness of the pharyngeal gland cells to decrease. NGM agar plates were seeded with a 30  $\mu$ l lawn of OP50 *E.coli* bacteria at four different densities. Wild type animals (AVG09, N=5-12) were then placed into each plate and allowed to feed for 30 minutes. After this, pharyngeal gland cells were filmed, and their brightness measured and normalized against their background. Values reported are mean+/- SEMs. Coefficient of determination  $r^2=0.32$ .

## Supplementary Tables

### Supplementary Table S1. Animal strains used in this study.

| Strain  | Allele | Position   | Mutation/genotype                                                                                                                                                                                                                         | Description                                                       |
|---------|--------|------------|-------------------------------------------------------------------------------------------------------------------------------------------------------------------------------------------------------------------------------------------|-------------------------------------------------------------------|
| N2      | n/a    | n/a        | WT                                                                                                                                                                                                                                        | Reference strain                                                  |
| TU3311  | n/a    | unknown    | <i>uls60 [unc-119p::YFP + unc-119p::sid-1]</i>                                                                                                                                                                                            | Hypersensitive neuronal RNAi                                      |
| COP1367 | knu384 | IV:9366441 | <i>pezo-1</i> (knu384 - 198bp deletion and 23bp insertion):<br>gaatcgggtggtcgtaacacagcaacaacaga//ATG<br>ACGGTCCCGCC - deletion of 198bp and insertion of<br>ACAGCAACAACAGAATGACGGTC -<br>TCGAAAGTCTTTAGCACTTCCCAgtaaga<br>aattaaagtcgatgt | leads to premature stop -<br>MTVPPQQQNDGLES*<br>*                 |
| COP1524 | knu490 | IV:9366455 | <i>pezo-1</i> GOF: R2373K (based on isoform G amino acid residues sequence)                                                                                                                                                               | Gain of function mutation affecting all isoforms.                 |
| COP1553 | knu508 | unknown    | <i>pezo-1</i> 6,616bp deletion                                                                                                                                                                                                            | 6.6kb deletion at 5' end of gene affects 8 longest isoforms (a-h) |
| AG405   | av143  | unknown    | <i>pezo-1</i> C-terminus deletion of Exon 27-33 + introns, generated by CRISPR/Cas9, inserted STOP CODON AFTER deletion                                                                                                                   | Deletion affecting 8 longest isoforms (a-h)                       |
| AG406   | av144  | unknown    | <i>pezo-1</i> N-terminus deletion of Exon 1-13 + introns, generated by CRISPR/Cas9, inserted STOP CODON AFTER deletion                                                                                                                    | Deletion affecting all isoforms of <i>pezo-1</i>                  |
| AG467   | av182  | n/a        | <i>pezo-1(av182 [pezo-1::mScarlet]) IV</i> ; CRISPR/Cas9 edit                                                                                                                                                                             | mScarlet in C terminus generated through CRISPR/Cas9              |
| AVG09   | ury09  | n/a        | <i>uryEx09[Ppezo-1::GCaMP6s::unc54_3'UTR, Pmyo-3::mCherry::unc54_3'UTR]</i>                                                                                                                                                               | GCaMP6s in pharyngeal glands, gonad and anal cells, red bodywall  |
| AVG10   | ury10  | n/a        | <i>uryEx10[Ppezo-1ah::GFP::unc54_3'UTR, Pmyo-3::mCherry::unc54_3'UTR]</i>                                                                                                                                                                 | GFP <i>pezo-1</i> a-h isoforms, red bodywall                      |
| AVG11   | ury11  | n/a        | <i>uryEx11[Ppezo-1ij::GFP::unc54_3'UTR, Pcoel::GFP::unc54_3'UTR]</i>                                                                                                                                                                      | GFP <i>pezo-1</i> i and j isoforms, GFP in coelomocyte            |
| AVG23   | ury12  | n/a        | <i>uryEx12[Ppezo-1k::GFP::unc54_3'UTR, Pmyo-3::mCherry::unc54_3'UTR]</i>                                                                                                                                                                  | GFP <i>pezo-1</i> isoform k, mCherry in body wall muscles         |
| AVG22   | ury13  | n/a        | <i>uryEx13[Ppezo-1l::GFP::unc54_3'UTR, Pcoel::GFP::unc54_3'UTR]</i>                                                                                                                                                                       | GFP <i>pezo-1</i> isoform l, GFP in coelomocyte                   |

### Supplementary Table S2. Primers used for the construction of strains used in this study.

| Primer                    | Sequence (5'-3')         | location    | Product |
|---------------------------|--------------------------|-------------|---------|
| <i>Ppezo-1</i> a-h FWD    | CATTCAAAGGAAGAGGCAGA     | IV: 9371411 |         |
| <i>Ppezo-1</i> a-h REV    | CTGAACAATCGCCGAGAAATCAAG | IV: 9366539 | 4,872bp |
| <i>Ppezo-1</i> i-j FWD    | TTGCAAAGTTCCCATGGTTT     | IV: 9360555 |         |
| <i>Ppezo-1</i> i-j REV    | GTCGATGGAGCTGATGTTGA     | IV: 9355693 | 4,862bp |
| <i>Ppezo-1GCAMP6s</i> FWD | GGCGCGTCGAGACCT          | IV: 9368065 |         |
| <i>Ppezo-1GCAMP6s</i> REV | TCTGTTGTTGCTGTGTTACGA    | IV: 9366455 | 1,610bp |
| <i>Ppezo-1</i> k FWD      | TTGCTCGCACAGTAGAATAGAAC  | IV: 9364926 |         |
| <i>Ppezo-1</i> k REV      | TGCTCTTCTTGGTGACGTTG     | IV: 9359527 | 5,399bp |
| <i>Ppezo-1</i> l FWD      | GCGATACCCTTGTCAGAAGC     | IV: 9353590 |         |
| <i>Ppezo-1</i> l REV      | GACCCATGAACACCAATC       | IV: 9348570 | 5,020bp |

**Supplementary Table S3.** Sequencing results from Source Bioscience for their new *pezo-1* RNAi clone (top), and alignments of the sequence to *C. elegans* genome (bottom) obtained through WormBase through ENSEMBL and BLASTX (Yates et al., 2020; Harris et al., 2020).

```

NNNNNNNNNNNNNNNNNNNNNNACTCCNNNAGGGNGNNNNNCAGATCTGATTGAGTGGGAACGATCGGAATTTGA
TATGTGTAGAGAACCAAGAAATGAAGCGCCGAGTAGAATATGAGAACTGAAAATATCGAAAAGGTTTTACAG
ATAAATTCGTACCGCCCATACCTTCTTTATCTGATTGTACTCCATGTCTCAGTGGTGTGTATGTGGACCAC
CACGTGGATATGAACAGAAAAGCGAGAAAGTAAATTGAGTTACTCAGCGATGGTTTCACGATTCCAACATATG
CCGTGAACAGGAAAAGCACGAAATTAGTCAATCTTCGTAGAGAAATTTCCGATTGCACTCCACATTATAGCGGC
TAACTTTCTTTGTCGTGCTTGTCTCGCGGCCACTGAAATAGTTAATATATTATTTGAGTTCATAAGTATATTCTAA
CGCAGGATTCCTGACTGTTACAACATCACCAACGACGTCCAATTGCTCGTCTCTATGCGACAAAACAT
GACGATTATGATAGTGAGCAGAGCTGCAGACGTGGCAATAATCTCCGGAAGAAATGCTCGAGTTGATTCAAT
GTTCTGTTGGATGGAATCGGACAAGGCCAATGCTCCGGAACAGAGTAGTGTCCGATCGATTGCAAATGTAT
GTCCGGTCTTTTTTATGAACAACCTTGTCTGAGATCTGTAANATAATATTTAATCAACTGTTTCATAANCTATTTT
TACCTGGNAGGAACCAACTCCTAGTGCAGCTGCTAGGCAGAAGAGAAAAGTGATAATANCGAATGTNCCAAC
AGTTNTNNNAAGAATATTGATTTCAACGACNTCNNACTTTAATTTCTTACNGGGAAGTGCTAAANACTTTTCGA
ATTGGTGGNAAANCGGCNCTGACAAGTGCAAGTAGNACNTANCCAATTGNTAAAAAGCTCGCCGGTTTATGG
GCAGCTGAAAAANTTGAGCNTTANNNTNTACTANNTTNNGGAAACACCTGTTNAAATGAAANAAAAANNAGCT
ANCCTGCNANNNGTGTGCCNGATAGCAGCANTTTGANNANNGCANNATTNNAAGNCGGCNNGNCCNCT
ATCNGTNNNNNTGGNNNNNCNCCCGGATNCNNNNNNANCNANNATNNNANNNTNNTCNNNNCCNN
CNCCNNNNNNNGGGGGNNGACCNNNTNCCCN
    
```

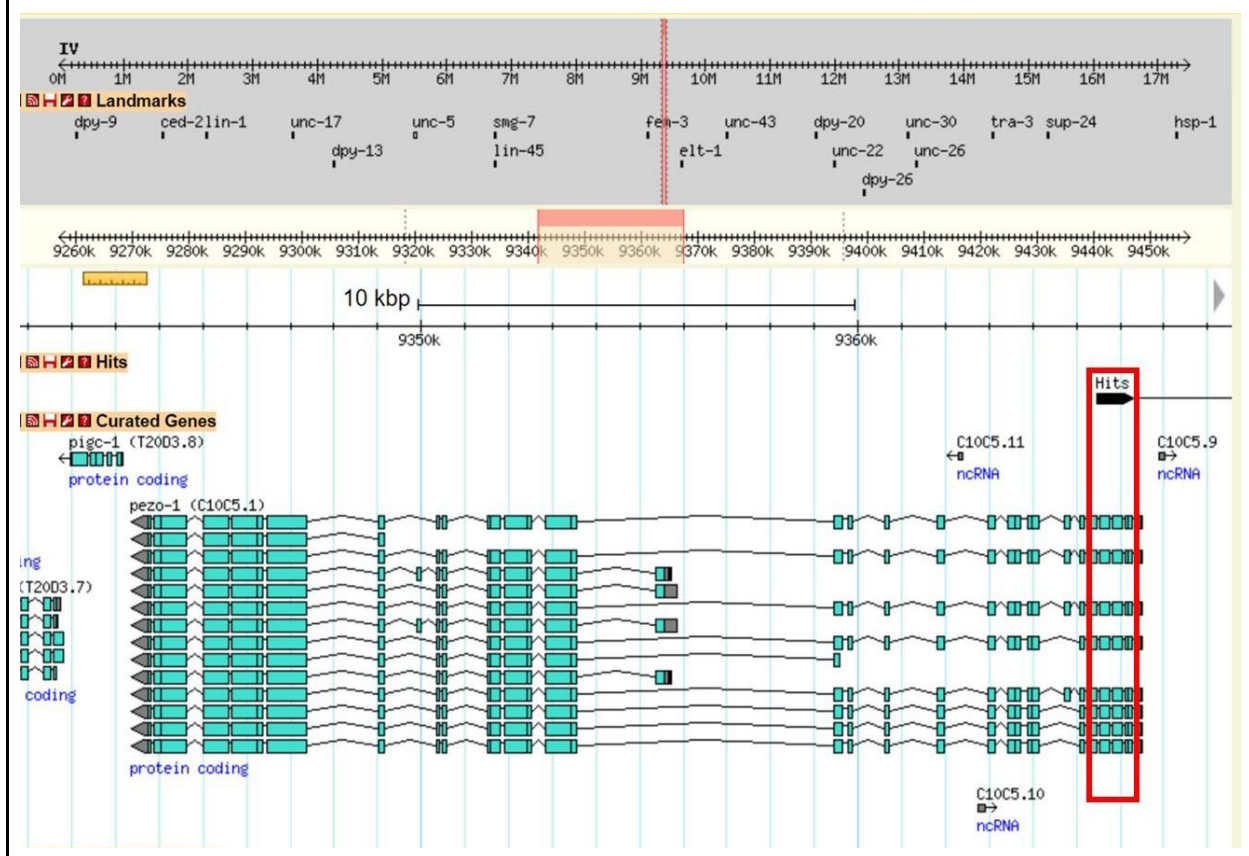

**Supplementary Table S4.** Statistical tests used for the different comparisons made in this study. Tests used and sample sizes (for each treatment) for the figures presented in this paper. For Figure 5 and 7D capitalized letters indicate  $P < 0.001$  while lower case letters indicate  $p < 0.05$ . For Figure 6B food density was combined into *low density* (A600=0.32-0.34), *medium density* (A600=2.41-3.49), and *high density* (A600=14.82-15.14).

| Figure     | Statistic test                                                                                                                                                                                                                                                                                                                                                                                                                                                                                                                                                                                                                                                                                                                                                                                                                                                                                                                                                                                                                                                                                                                                                                                                                                                            | N     | Significance                     |
|------------|---------------------------------------------------------------------------------------------------------------------------------------------------------------------------------------------------------------------------------------------------------------------------------------------------------------------------------------------------------------------------------------------------------------------------------------------------------------------------------------------------------------------------------------------------------------------------------------------------------------------------------------------------------------------------------------------------------------------------------------------------------------------------------------------------------------------------------------------------------------------------------------------------------------------------------------------------------------------------------------------------------------------------------------------------------------------------------------------------------------------------------------------------------------------------------------------------------------------------------------------------------------------------|-------|----------------------------------|
| Figure 5A  | One-Way ANOVA with Holm-Sidak test (all pairwise), $F=16.9$ , $DF=5$                                                                                                                                                                                                                                                                                                                                                                                                                                                                                                                                                                                                                                                                                                                                                                                                                                                                                                                                                                                                                                                                                                                                                                                                      | 10    | * $p < 0.05$                     |
| Figure 5B  | One-Way ANOVA with Holm-Sidak test (all pairwise), $F=13.5$ , $DF=5$                                                                                                                                                                                                                                                                                                                                                                                                                                                                                                                                                                                                                                                                                                                                                                                                                                                                                                                                                                                                                                                                                                                                                                                                      | 10-12 | * $p < 0.05$                     |
| Figure 6A  | Mann-Whitney Rank Sum Test, U statistic =194                                                                                                                                                                                                                                                                                                                                                                                                                                                                                                                                                                                                                                                                                                                                                                                                                                                                                                                                                                                                                                                                                                                                                                                                                              | 29    | ** $p < 0.001$                   |
| Figure 6B  | Two-Way ANOVA (with Holm-Sidak method at significance level =0.05 ).<br>Strain $F=8.5$ $DF=5$ $p < 0.001$ ; Food density $F=37.2$ $DF=2$ $p < 0.001$ ; Strain x Food density $F=3.9$ $DF=10$ $p < 0.001$ . Power=1.0 for three conditions at $\alpha=0.05$<br><br><b>Food density</b><br>N2: High vs Low**, High vs Med*, Medium vs Low**<br>Cop1553: High vs Low <sup>ns</sup> , High vs Med*, Medium vs Low*<br>Cop1367: High vs Low <sup>ns</sup> , High vs Med <sup>ns</sup> , Medium vs Low <sup>ns</sup><br>AG405: High vs Low**, High vs Med*, Medium vs Low**<br>Cop1524: High vs Low**, High vs Med <sup>ns</sup> , Medium vs Low*<br>AG406: High vs Low**, High vs Medium <sup>ns</sup> , Medium vs Low <sup>ns</sup><br><br><b>Strain in high food density</b><br>N2 vs: Cop1553**, Cop1367**, Cop1524*, AG406 <sup>ns</sup> , AG405 <sup>ns</sup><br>Cop1553 vs: Cop1367 <sup>ns</sup> , Cop1524 <sup>ns</sup> , AG406**, AG405**<br>Cop1367 vs: Cop1524 <sup>ns</sup> , AG406*, AG405**<br>Cop1524 vs: AG406 <sup>ns</sup> , AG405*<br>AG406 vs AG405 <sup>ns</sup><br><br><b>Strain in medium food density</b><br>N2 vs Cop1524* (all other comparisons n.s.)<br><br><b>Strain in low food density</b><br>Cop1524 vs Cop1367** (all other comparisons n.s.) | >10   | * $p < 0.05$ ,<br>** $p < 0.001$ |
| Figure 6C  | One-Way ANOVA on Ranks (Dunn's on all Pairwise)                                                                                                                                                                                                                                                                                                                                                                                                                                                                                                                                                                                                                                                                                                                                                                                                                                                                                                                                                                                                                                                                                                                                                                                                                           | 10-26 | * $p < 0.05$                     |
| Figure 6D  | One-Way ANOVA on Ranks (Dunn's on all Pairwise)                                                                                                                                                                                                                                                                                                                                                                                                                                                                                                                                                                                                                                                                                                                                                                                                                                                                                                                                                                                                                                                                                                                                                                                                                           | 10-26 | * $p < 0.05$                     |
| Figure 6E  | One-Way ANOVA on Ranks (Dunn's on all Pairwise)                                                                                                                                                                                                                                                                                                                                                                                                                                                                                                                                                                                                                                                                                                                                                                                                                                                                                                                                                                                                                                                                                                                                                                                                                           | 10-26 | * $p < 0.05$                     |
| Figure 7B  | 2nd order regression                                                                                                                                                                                                                                                                                                                                                                                                                                                                                                                                                                                                                                                                                                                                                                                                                                                                                                                                                                                                                                                                                                                                                                                                                                                      | >10   | $r^2=0.44$                       |
| Figure 7C  | 2nd order regression                                                                                                                                                                                                                                                                                                                                                                                                                                                                                                                                                                                                                                                                                                                                                                                                                                                                                                                                                                                                                                                                                                                                                                                                                                                      | >10   | $r^2=0.23$                       |
| Figure 7D  | Two-Way ANOVA (with Holm-Sidak method at significance level =0.05 ).<br>RNAi treatment $F=65.5$ $DF=1$ $p < 0.001$ ; Food exposure $F=15.5$ $DF=2$ $p < 0.001$ ;<br>RNAi treatment x Food exposure $F=20.5$ $DF=2$ $p < 0.001$ . Power=0.99-1.0 for three conditions at $\alpha=0.05$<br><br><b>Food exposure</b><br>RNAi_Ctrl<br>on food 1 vs: off food**, on food 2**<br>Off food vs: on food 2*<br><br><b>RNAi treatment</b><br>On food 1: RNAi_Ctrl vs RNAi_pezo-1**<br>Off food: RNAi_Ctrl vs RNAi_pezo-1*<br>On food 2: RNAi_Ctrl vs RNAi_pezo-1*                                                                                                                                                                                                                                                                                                                                                                                                                                                                                                                                                                                                                                                                                                                   | 10    | * $p < 0.05$ ,<br>** $P < 0.001$ |
| SuppFig 1A | One-Way ANOVA, $F=1.9$ , $DF=2$                                                                                                                                                                                                                                                                                                                                                                                                                                                                                                                                                                                                                                                                                                                                                                                                                                                                                                                                                                                                                                                                                                                                                                                                                                           | >20   | $p=0.16$                         |
| SuppFig 1B | One-Way ANOVA on Ranks                                                                                                                                                                                                                                                                                                                                                                                                                                                                                                                                                                                                                                                                                                                                                                                                                                                                                                                                                                                                                                                                                                                                                                                                                                                    | >20   | $p=0.24$                         |
| SuppFig 1C | One-Way ANOVA on Ranks                                                                                                                                                                                                                                                                                                                                                                                                                                                                                                                                                                                                                                                                                                                                                                                                                                                                                                                                                                                                                                                                                                                                                                                                                                                    | >20   | $p=0.41$                         |
| SuppFig 2  | 1st order regression                                                                                                                                                                                                                                                                                                                                                                                                                                                                                                                                                                                                                                                                                                                                                                                                                                                                                                                                                                                                                                                                                                                                                                                                                                                      | 5-12  | $r^2=0.32$                       |

**Supplementary Table S5.** Expression profile for *pezo-1* in L1-L4 *C. elegans* larvae obtained through The *C. elegans* Neuronal Gene Expression Map & Network (CeNGEN, Hammarlund et al., 2018). A total of 135 Cells/tissues were found to express *pezo-1* during development. Expression levels were calculated using network Differential Gene Expression (nDGE) analysis. Isoforms identified to be expressed in relevant tissues (through PCR-fusion) are indicated.

| Cell           | Exp. level | Isoform  | Cell             | Exp. level | Isoform | Cell                 | Exp. level | Isoform |
|----------------|------------|----------|------------------|------------|---------|----------------------|------------|---------|
| NSN            | 338.659    | a-h      | RIH              | 30.358     |         | RMF                  | 6.588      |         |
| VA12           | 321.08     |          | PVW              | 29.583     |         | SMD stress           | 6.424      |         |
| PVD            | 273.595    | i-j      | AVB              | 28.631     |         | RMD DV               | 6.091      |         |
| PVT            | 233.318    |          | PHA              | 28.086     | k       | PLM                  | 5.817      |         |
| CAN            | 200.129    |          | AS               | 27.483     |         | ASER                 | 5.685      |         |
| VB             | 162.988    | k        | AWC OFF          | 27.445     |         | FLP                  | 5.601      | i-j     |
| Marginal cell  | 112.52     | i-j      | AVF              | 25.945     |         | Vulva muscle         | 5.34       | a-h     |
| BDU            | 105.389    |          | Glia 2           | 25.194     |         | SIB                  | 5.301      |         |
| NSM            | 105.13     |          | DVC              | 25.178     |         | Anal muscle          | 5.222      | a-h     |
| PVP            | 100.069    |          | PVC              | 23.789     |         | AIM                  | 5.13       |         |
| DB             | 97.148     |          | Epidermis        | 22.811     |         | VB01                 | 5.114      |         |
| PHsh           | 90.926     |          | ADF              | 22.45      |         | CEPsh                | 4.859      |         |
| RIR            | 86.999     |          | IL2 LR           | 21.27      |         | AIB                  | 4.563      |         |
| PHso           | 84.345     |          | CEP              | 20.118     |         | AVL                  | 4.45       |         |
| URA            | 77.389     |          | RIC              | 19.994     |         | Body wall muscle ant | 3.943      | a-h     |
| AMso           | 74.719     | a-h      | AWC ON           | 19.589     |         | VC 4&5               | 3.963      |         |
| VA             | 70.921     |          | ASG              | 19.085     |         | SMD                  | 3.803      |         |
| DA9            | 70.243     |          | IL2 DV           | 18.652     |         | Unknown cell 2       | 3.63       |         |
| l4             | 69.573     |          | ASK              | 18.651     |         | RIS                  | 3.592      |         |
| VB02           | 68.162     |          | SIA              | 18.118     |         | RIB                  | 3.574      |         |
| Spermatheca    | 65.54      |          | Unknown          | 17.921     |         | Pharyngeal muscle    | 3.412      | a-h     |
| Glia 4         | 63.117     |          | ASJ              | 17.154     |         | MC                   | 3.386      |         |
| Glia 1         | 62.07      |          | ADA              | 16.9       |         | AFD                  | 3.376      |         |
| Gon. sheath    | 59.384     |          | Germline         | 16.375     |         | AWB                  | 3.355      |         |
| AVD            | 57.962     |          | Body wall        | 15.647     | a-h, k  | ADL                  | 3.294      |         |
| Glia 3         | 56.962     |          | PDB              | 14.718     |         | URX                  | 3.113      |         |
| DA             | 54.272     |          | VD DD            | 14.571     |         | AIN                  | 3.05       |         |
| Arcade cell    | 53.602     | k        | Coelom           | 14.14      |         | RMD LR               | 2.907      |         |
| DB01           | 52.126     |          | Rectal gland     | 13.392     | a-h     | BAG                  | 2.791      |         |
| RIP            | 45.997     |          | AVE              | 12.256     |         | SAB                  | 2.334      |         |
| Sperm          | 45.68      |          | AVJ              | 12         |         | VC                   | 2.178      |         |
| DVB            | 45.997     |          | ASEL             | 11.957     |         | AUA                  | 2.03       |         |
| M2             | 43.768     |          | Spermatheca      | 11.805     |         | AMsh                 | 1.987      | a-h     |
| Unkn. cell 1   | 43.121     |          | ASH              | 11.654     |         | AVK                  | 1.787      |         |
| Dist. tip cell | 41.971     |          | PLN              | 11.441     |         | AIY                  | 1.7        |         |
| Unannotated    | 39.01      |          | RMH              | 11.336     |         | RIA                  | 1.51       |         |
| AIA            | 37.666     |          | Excretory        | 10.749     | i-j     | Vulval cells         | 1.364      |         |
| Uterine        | 36.89      | a-h      | Seam cell        | 10.43      |         | RIM                  | 1.333      |         |
| Intestine      | 35.362     | i-j      | RIV stress       | 10.392     |         | AVM                  | 1.253      |         |
| ASI            | 34.146     |          | Pharyngeal gland | 10.006     | a-h     | PVQ                  | 1.227      |         |
| AVG            | 33.602     |          | AVA              | 9.402      |         | RIV                  | 1.156      |         |
| l3             | 33.109     | a-h, i-j | AVH              | 8.986      |         | RID                  | 1.056      |         |
| LUA            | 31.109     |          | SMB              | 8.698      |         | M5                   | 0.749      |         |
| PHB            | 30.693     |          | ALM              | 8.441      |         | RIG                  | 0.549      |         |
| AWA            | 30.638     |          | l1               | 7.236      |         | AIZ                  | 0.539      |         |
